# 1 **Otolith microchemistry identifies diadromous populations of Patagonian river** 2 **fishes**

3  
4 **Authors:** Dominique Alò<sup>1</sup>, Cristián Correa<sup>2</sup>, Horacio Samaniego<sup>2</sup>, Corey A. Krabbenhoft<sup>3, 4</sup>, Thomas  
5 F. Turner<sup>3</sup>

6  
7 <sup>1</sup>Departamento de Ecología, Pontificia Universidad Católica de Chile, Santiago, Chile

8 <sup>2</sup>Instituto de Conservación Biodiversidad y Territorio, Universidad Austral de Chile, Valdivia, Chile

9 <sup>3</sup>Department of Biology and Museum of Southwestern Biology, University of New Mexico,  
10 Albuquerque, NM, U.S.A

11 <sup>4</sup>present address: Department of Biological Sciences, Wayne State University, Detroit, MI, U.S.A.

12  
13 **Keywords:** nonnative species, Pacific salmon, estuary, life history, facultative migration, hydropower

14  
15 **Correspondence:** Dominique Alò, dominiquealo@gmail.com, Tel: +56 (9) 53348887, ORCID 0000-  
16 0003-0579-4156

## 17 18 **Acknowledgements**

19 We are thankful to A.P. Bravo, I.Y. Quinteros, M. Soto-Gamboa, and L. Caputo for assistance  
20 in the field, and to M.L. Guillemín for providing field equipment. S. Platania and M. Brandenburg  
21 assisted with laboratory procedures and logistics. The Museum of Southwestern Biology at UNM  
22 provided curatorial assistance. We thank P. Marquet for revising an earlier version of this manuscript,  
23 A. Castillo for help with GIS mapping, E. Habit for a useful discussion.

24

25 **Compliance with Ethical Standards**

26 Otolith analysis was funded by a RAC grant from the University of New Mexico, USA. The  
27 Government of Chile supported the drafting of this document with a CONICYT Doctoral Fellowship to  
28 D. Alò in 2015 and to C. Correa through grants CONICYT-PAI N°82130009, and FONDECYT-  
29 Iniciación en la Investigación N°11150990.

30 All applicable international, national, and/or institutional guidelines for the care and use of  
31 animals were followed. Specimens were collected under permits No. 3587, 29 December 2006, and No.  
32 2886, 4 November 2008 (amendment No. 602, 12 February 2009) granted by the Chilean Subsecretary  
33 of Fishing to C. Correa. The McGill University Animal Care Committee (UACC), Animal Use  
34 Protocol No. 5291, approved use and handling of animals.

35

36 **Abstract**

37 Coastal habitats in Chile are hypothesized to support a number of diadromous fishes. The objective of  
38 this study was to document migratory life histories of native galaxiids and introduced salmonids from a  
39 wide latitudinal range in Chilean Patagonia (39-48°S). Otolith microchemistry data were analysed  
40 using a recursive partitioning approach to test for diadromy. Based on annular analysis of Sr:Ca ratios,  
41 a diadromous life history was detected for populations of native *Aplochiton taeniatus*, *A. marinus*, and  
42 *Galaxias maculatus*. Lifetime residency in freshwater was suggested for populations of *A. zebra* and *G.*  
43 *platei*. Among introduced salmonids, populations of *Oncorhynchus tshawytscha* and *O. kisutch*  
44 exhibited anadromous migratory patterns, whereas the population of *O. mykiss* screened appeared  
45 restricted to freshwater. *Salmo trutta* exhibited variable habitat use consistent with establishment of an  
46 ocean-type life history in some populations. The capacity and geographic scope of hydropower  
47 development is increasing and may disrupt migratory routes of diadromous fishes. Identification of  
48 diadromous species is a critical first step for preventing their loss due to hydropower development.

49

## 50 **Introduction**

51           Only 47 native and 27 non-native inland fish species are currently recognized in Chile, and  
52 about 30% of these are thought to exhibit some tolerance for shifting between saline and freshwater  
53 habitats (Dyer, 2000; Habit & Victoriano, 2005; Habit et al., 2006; Vila et al., 2011; Ministerio del  
54 Medio Ambiente, 2013; Vargas et al., 2015). Furthermore, roughly 15% of these fishes are  
55 hypothesized to display diadromous migratory behaviour (Table S1), compared to less than 1% for  
56 fishes worldwide (Nelson, 2006).

57           The term diadromy describes regular, predictable, and physiologically mediated movements  
58 between freshwater and the sea. Diadromy necessitates profound physiological changes (i.e.,  
59 osmoregulation) when shifting from marine to freshwater habitats and vice versa (Gross et al., 1988).  
60 Diadromy is obligatory for many populations within a species, but also can be facultative (Dingle &  
61 Drake, 2007). The direction of migration depends on life history stages and habitats where reproductive  
62 and feeding events occur. The combination of these factors defines three different types of diadromy:  
63 anadromy, catadromy, and amphidromy (Myers, 1949; Gross, 1987; Gross et al., 1988; McDowall,  
64 1992, 1997; Limburg et al., 2001) (in particular refer to McDowall 1997 for a review of the  
65 terminology and a visual aid).

66           Given the high percentage of fishes in Chile hypothesized to exhibit some form of diadromy,  
67 migration might play an important, yet unrecognized role in establishing national priorities of aquatic  
68 biodiversity conservation. At present, a high percentage of the continental ichthyofauna in Chile is  
69 categorized with some degree of conservation threat by Chilean environmental agencies and other  
70 authors, although conservation categories can be incongruent and threats underestimated (Habit &  
71 Victoriano, 2005; Diario Oficial de la Republica de Chile, 2008; Ministerio del Medio Ambiente, 2013;  
72 IUCN, 2015; Vargas et al., 2015).

73           Coastal habitats in Chile appear well suited to support establishment of diadromous species.  
74 Andean rivers that flow into the Pacific Ocean include a variety of different habitats in a limited

75 longitudinal distance (average 145 km), spanning from areas of rocky substrates, high gradient, clear  
76 waters and low temperatures, to areas of low flow, sandy substrates, and aquatic vegetation (Habit &  
77 Victoriano, 2005; Instituto Nacional de Estadísticas, 2015). Spatial habitat heterogeneity is essential for  
78 maintenance and completion of diadromous life cycles, and for maintaining evolutionary potential (i.e.,  
79 genetic diversity) for life history variation (Pulido, 2007; Dingle, 2014). Therefore, fragmentation  
80 events imposed by human-made barriers may affect fish fitness and restrict movement between habitats  
81 more so than in other areas (Waples et al., 2007).

82 Patagonian fishes offer a unique opportunity to understand migration patterns in relatively  
83 pristine habitats, and establish a baseline against which future potential impacts associated with river  
84 impoundments can be compared. Despite strong economic growth and efforts to develop hydroelectric  
85 potential to meet the country's high-energy requirements (Joo et al., 2015), many rivers in southern  
86 Chile are still free-flowing, offering opportunities to study pre-impoundment patterns of diadromous  
87 migration. For example, galaxiid fishes are distributed across the Southern Hemisphere and diadromy  
88 seems to be a recurrent trait among many of the species (McDowall, 1971, 1988). Likewise, salmonids  
89 are among some of the best-studied diadromous fishes in the Northern Hemisphere and are now well-  
90 established in southern Chile (McDowall, 2002; Correa & Gross, 2008).

91 Using micro-geochemical data obtained from otoliths, this study sought to determine whether  
92 native galaxiids and introduced salmonids exhibit diadromy in Chilean rivers. Otoliths are calcified  
93 deposits in the inner ear of fishes that accumulate in ring-like fashion over ontogenetic growth.  
94 Elemental analysis of otoliths can help to distinguish origins of marine and freshwater fishes among  
95 locations with variable water chemistry. Differing chemical composition of the otolith from the  
96 primordium (core) to the edge indicates the different environments in which a fish has lived and allows  
97 for hypothesis tests related to patterns of fish movement. When analysed sequentially across an otolith  
98 sagittal section, changes in elemental ratios can indicate fine-scale patterns of movement, connectivity,  
99 dispersal, and the location of natal habitats (Halden et al., 2000; Howland et al., 2001; Kraus, 2004;

100 Ashford et al., 2005; Campana, 2005; Arkhipkin et al., 2009). To quantify these changes in Patagonian  
101 fishes, we applied univariate recursive partitioning approaches based on Classification and Regression  
102 Trees (CART) to detect discontinuities in ratios that indicate habitat shifts (Vignon, 2015).

103

## 104 **Methods**

### 105 **Fish Collections**

106 Between 2004 and 2011, specimens of *Aplochiton zebra*, *A. taeniatus*, *A. marinus*, *Galaxias*  
107 *maculatus*, *G. platei*, *Oncorhynchus tshawytscha*, *O. kisutch*, *O. mykiss*, and *Salmo trutta* were collected  
108 using various methods from 6 locations across a large latitudinal range (39.5–48.0° S) in western  
109 Patagonia, Chile (Fig. 1, Table 1). At each location, fish specimens were euthanized by an overdose of  
110 anaesthetic solution (tricaine-methanesulfonate MS-222 or clove oil). Due to the difficulties in  
111 morphological identification, genetic data were used to identify individuals in the genus *Aplochiton* to  
112 the species level (Alò et al., 2013).

### 113 **Otolith preparation**

114 Prior to specimen preservation, sagittal otoliths were extracted and either stored dry in test tubes  
115 or in 95% ethanol, as elemental compositions and structures of otoliths are not strongly affected by  
116 ethanol for the elements assayed (Proctor & Thresher, 1998).

117 In the laboratory, otoliths were polished, cleaned, and mounted individually on clean glass  
118 slides using a thermoplastic cement (Crystalbond™). In order to expose growth rings, 3M™ (fine) and  
119 Nanolap® Technologies (coarse) diamond lapping film wetted with deionized water was used to  
120 polish otoliths by hand until a satisfactory sagittal section of annuli was visible. For *Aplochiton* spp.,  
121 *Galaxias* spp., *S. trutta*, *O. kisutch* and *O. mykiss* otoliths, a 30-µm and then 3-µm lapping film was  
122 used to expose annuli and get a finished polish. *O. tshawytscha* otoliths required larger lapping film (45  
123 and 60 µm) to reach an appropriate view, but were finished with 3 µm film for increased clarity. After  
124 the initial polish, and where necessary (largely for *O. tshawytscha*), the adhesive was melted and the

125 otolith flipped for double polishing to produce a thinner section.

126       Following polishing, the mounting adhesive was dissolved in 100% acetone bath and sonicated  
127 for 10 minutes. Larger otoliths were cleaned a second time with acetone as needed. Each otolith was  
128 then sonicated twice in Milli-Q water for 5 to 10 minutes each. Following cleaning, otoliths were rinsed  
129 a final time in Milli-Q water, transferred to clean vials and placed in a positive laminar flow hood for  
130 24-48 hours to dry.

131       Acid-washed porcelain forceps were used to mount clean, dry otoliths on acid-washed  
132 microscope slides. Otoliths were grouped according to diameter and mounted 10-28 per slide  
133 accordingly. Each otolith was placed within one small drop of fresh Crystalbond melted onto a single  
134 slide.

135       Slides were securely kept in acid-washed, sealed petri dishes for transport to Woods Hole  
136 Oceanographic Institute (Woods Hole, MA, U.S.A.). There, laser ablation was conducted from October  
137 8<sup>th</sup> to 11<sup>th</sup>, 2012 (*Aplochiton* spp., *S. trutta*, *Galaxias* spp., *O. kisutch*, and *O. mykiss*) and again from  
138 February 4<sup>th</sup> to 5<sup>th</sup>, 2013 (*O. tshawytscha*). Laser ablation was performed with a large format laser  
139 ablation cell on a New Wave UP193 (Electro Scientific Industries, Portland, Oregon) short pulse width  
140 excimer laser ablation system. This was coupled with a Thermo Finnigan Element2 sector field argon  
141 plasma spectrometer (Thermo Electron Corporation, Bremen, Germany) for elemental analysis. The  
142 laser was configured for single pass, straight line scanning at a speed of 5  $\mu\text{m}$  per second. The laser  
143 beam spot size was 50  $\mu\text{m}$  at 75% intensity and 10 Hz pulse rate. Concentrations were determined for  
144 elemental Strontium (Sr) and Calcium (Ca) since strontium has been identified as a useful trace  
145 element to reconstruct environmental history of fishes and discern habitat shifts across salinity  
146 gradients (Secor & Rooker, 2000; Campana, 2005; Pracheil et al., 2014).

147       Certified standards FEBS-1 and NIES-022 were run before and after each block of 10 to 28  
148 otoliths to account for quality assurance in the measurements (Yoshinaga et al., 2000; Sturgeon et al.,  
149 2005). Each otolith was visualized on screen and the intended ablation transect of each sample was

150 plotted digitally and analysed by ablation with a laser beam (refer to Fig. 2 for a visual example). For  
151 accuracy of readings, each data point was produced from an average of ten consecutive reads. The ideal  
152 double life-history transect ran across each sagittal otolith and through the primordium, thus providing  
153 two similar (redundant) patterns related to life history variation, one on either side of the primordium.  
154 Interpretations were based on the analyses of both sides of each double transect, if possible. However,  
155 in a number of cases, transects were imperfect due to damaged otoliths or inaccurate ablation pathways  
156 (Table S2). In such cases, data were analysed as partial transects that can still be used to differentiate  
157 diadromous or resident signals (Fig. 2).

158

## 159 **Data Analysis**

160 Classification and Regression Trees (CART, Breiman et al. 1984)) were used to detect shifts in  
161 elemental ratios across the otolith transect. CART is an alternative to qualitative methods traditionally  
162 used to interpret the chronological signal in otolith microchemistry transects (Vignon, 2015). The  
163 position along the otolith transect (predictor variable) was recursively partitioned using regression trees  
164 in order to differentiate segments of the transect that shared similar mean Sr:Ca values (response  
165 variables) (Breiman et al., 1984; Therneau & Atkinson, 1997; De'ath, 2002; Strobl, 2009). CART was  
166 implemented in the Tampo library (version 1.0) for R Statistical Software 3.0.2 (Vignon, 2015).

167 Elemental data and otolith transects were rigorously checked, and outliers caused by recording  
168 errors were removed (additive outliers, R Package "tsoutliers" v: 0.6–5, L'opez-de-Lacalle 2016).  
169 Summary statistics of Sr:Ca ratios were calculated across all individuals. Since the main goal of this  
170 work was to represent movement patterns at a broad scale, CART analysis was used in a semi-  
171 supervised manner to identify the presence or absence of sudden discontinuities in the Sr:Ca otolith  
172 signal (Vignon, 2015). This was done by introducing three progressively relaxed conditions to the  
173 splitting procedure, which required setting a minimum difference in mean values in order to allow a  
174 split in elemental signals. The minimal differences required to allow regression tree pruning were set to



175 condition =1.0, cond.=0.7 and cond. =0.5. The detection of one or more discontinuities or splits in the  
176 Sr:Ca signal was interpreted as evidence for diadromy, or otherwise, evidence for residency. When  
177 diadromy was detected, the direction of ontogenetic movements was inferred from differences in  
178 segment means; increasing values indicated movements towards the sea, and vice versa. Further  
179 inference about habitat occupancy (freshwaters, estuaries, or the sea) required a visual, heuristic  
180 examination of Sr:Ca profiles in relation to published reference values. Finally, all evidence was  
181 assembled to make individual inferences about specific migration patterns (amphidromous,  
182 catadromous, or anadromous). In this process, otolith transect quality affected our confidence on  
183 interpretations; from maximum confidence on inferences from transects that conformed to the model in  
184 Fig. 2, to uncertain interpretations from incomplete or faulty transects.

185 Reference values for the three major habitat types (freshwater, estuarine, and marine) were  
186 obtained from a meta-analysis of Sr:Ca profiles from otoliths of 41 fish species in three salinity  
187 regimes, and were summarised as follows (extracted from Fig. 7 in Secor and Rooker 2000):  
188 Freshwater (salinity 0-5 ppt): 10 species screened, mean Sr:Ca (10-90<sup>th</sup> percentile range) 0.9 (0.3-1.8)  
189 mmol mol<sup>-1</sup>; Estuarine (5-25 ppt): 11 spp., 2.0 (0.9-3.1) mmol mol<sup>-1</sup>; Marine (>25 ppt): 20 spp., 3.4  
190 (1.9-5.2) mmol mol<sup>-1</sup>.

191

## 192 **Results**

193 Observed variation in Sr:Ca ratios was generally bounded within previously reported reference  
194 ranges determined by meta-analysis (Fig. 3; Secor & Rooker 2000). CART analysis identified patterns  
195 of change in Sr:Ca elemental ratios consistent with the different migratory life histories proposed in the  
196 schematic representation in Fig. 2, and some representative individuals for each species are shown in  
197 Fig. 4. Details on the splitting results of all individuals under different stringency conditions are given  
198 in Fig. 5 whereas Table S2 reports details on the mean and standard deviation at each split. A summary  
199 of the inferred migratory strategy for each species is shown in Table 1.

200

201 **Native galaxiids.**

202 Large elemental shifts in otolith profiles indicated a catadromous life-history for most *A.*  
203 *taeniatus* analysed (Table 1 and Fig. 5). Even when confined to strictly freshwater habitats, as in Lake  
204 Caro, *A. taeniatus* juveniles showed patterns of habitat mobility (Fig. 5, cond.= 0.5), as contrasted with  
205 *A. zebra* or *O. mykiss*, which showed long-term residency in the same environment.

206 Otolith profiles (Fig. 4 and 5) suggested that *A. marinus* copes with high levels of salinity  
207 variation in the Baker River system. Otolith primordia of all specimens of *A. marinus* showed evidence  
208 of higher Sr:Ca ratios at early stages of growth, presumably before the fish entered the estuary (site of  
209 capture). Taken together, these data suggest that *A. marinus* is catadromous.

210 Results indicated that *A. zebra* uses a chemically uniform habitat at both collection localities  
211 (Fig. 4), although results should be corroborated by future studies because *A. zebra* individuals assayed  
212 were juveniles. Nevertheless, specimens from Tocoihue River appear to have been exposed to higher  
213 salinity levels than those from Lake Caro (Table S2), suggesting preference for freshwater residency,  
214 but capacity for osmoregulation when salinity levels increase.

215 *G. maculatus* individuals were sampled from the same site as some specimens of *A. zebra*  
216 (Tocoihue). However, among the four specimens assayed, three showed exposure to higher salinity  
217 than any other galaxiid species analysed (Fig. 3) with evidence of both catadromous and  
218 amphidromous transitions from brackish to saltwater (Table 1). The *G. maculatus* specimen in Fig. 4  
219 was caught in the lower reach of Tocoihue River, an area with strong tidal influence. It shows an  
220 amphidromous life-cycle with intermediate salinity influence in the primordium followed by a period  
221 of residency in higher salinity and subsequent migration back into brackish and freshwater (as also  
222 observed by McDowall (1968)). A fourth specimen of *G. maculatus* showed no major Sr:Ca  
223 fluctuations across the otolith transect (Table S2), suggesting that this individual did not drift out to the  
224 ocean during its larval stage and it was likely a resident of the estuarine area in Tocoihue.

225 Only one specimen from the low-elevation coastal Palos Lake was assayed for *G. platei*, and  
226 results indicate freshwater residency as revealed by uniformly low Sr:Ca ratios across the entire otolith  
227 transect (Fig. 3 and 4).

228

### 229 **Introduced salmonids**

230 This study supports established anadromy in *O. tshawytscha*, as previously shown by other  
231 authors (Ciancio et al., 2005; Correa & Gross, 2008; Arismendi & Soto, 2012; Araya et al., 2014). Data  
232 are consistent with regularly timed changes in Sr:Ca concentration levels that suggest hatching in  
233 freshwater, migration to areas with higher salinity concentrations and a return to inland, freshwater  
234 areas to spawn (Fig. 4). *O. tshawytscha* specimens collected from the Simpson River do not show as  
235 much variation as other *O. tshawytscha* from this study as these fish were all juveniles that had not yet  
236 migrated.

237 The two parr *O. kisutch* analysed revealed one large scale habitat shift between birth and time of  
238 capture. Both otolith profiles were characterized by a relatively high Sr:Ca signature around the core  
239 which diminished substantially towards the edges (Fig. 4). These specimens were caught during the  
240 summer, about 55 km upstream of the Baker River's mainstream. Thus, observed patterns could  
241 plausibly be induced by maternal effects (Kalish, 1990; Volk et al., 2000; Zimmerman & Reeves,  
242 2002). Additionally, there is already some evidence pointing to young-of-the-year *O. kisutch* recruits in  
243 remote freshwater fjords of southern Chile (Górski et al., 2016). Accordingly, these specimens were  
244 interpreted as anadromous by maternal origin. Conversely, *O. mykiss* exhibited a pattern consistent  
245 with freshwater residency and minor salinity fluctuations within their habitat over the entire life cycle  
246 (Fig. 3 and 5).

247 Evidence of at least two different life cycle patterns emerged for *S. trutta* specimens caught at  
248 three different locations. The Sr:Ca transect of juveniles from Lake Caro and adults from Lake Palos  
249 showed a pattern consistent with continuous residency in freshwater (Fig. 3 and 5) whereas *S. trutta*

250 from Baker River showed higher values at the primordium (Fig. 4).

251

## 252 **Discussion**

253 This study quantitatively identified significant transitions across otolith profiles using regression  
254 trees on Sr:Ca ratios. Native galaxiids showed considerable variation in habitat shifts when compared  
255 across species, with some species exhibiting differences at the population and individual levels,  
256 indicating a high degree of plasticity. Of five native galaxiids examined, evidence was found for one  
257 catadromous (*A. marinus*) and two facultatively amphidromous or catadromous species (*G. maculatus*  
258 and *A. taeniatus*). Nonnative salmonids have established populations with a broad array of migratory  
259 life histories, reflective of those found in their native ranges. Patterns consistent with anadromy were  
260 present in three (*O. tshawytscha*, *O. kisutch*, *S. trutta*) of four species included in this study.

261 Overall, several species appear to regularly use habitats with different salinity levels. Otolith  
262 profiles that showed variation under the most restrictive analytical conditions were those most likely to  
263 exhibit large-scale habitat shifts between different environments and salinity levels (*A. taeniatus*, *A.*  
264 *marinus*, *G. maculatus*, *O. tshawytscha*). Otolith profiles that varied under less stringent conditions  
265 provided information about subtler shifts within habitat types.

266 Results suggest a preponderance of euryhaline and facultative diadromous species among native  
267 galaxiids and introduced salmonids in Patagonia. The inferences on species migratory status by  
268 population reported in Table 1 suggest that some species display a diverse range of life history  
269 strategies (facultative diadromy), coinciding with an increasing number of studies reporting flexibility  
270 in diadromous patterns for numerous fishes. These studies, which also include some Southern  
271 Hemisphere fishes, evidenced the extent of variability of resident/migratory life histories within single  
272 species, often shifting from the classical view that tended to categorize species as either exclusively  
273 resident or migratory (Hicks et al., 2010; Augspurger et al., 2015; Górski et al., 2015).

274 Observed otolith microchemistry for introduced salmonids showed that some species have

275 established movement strategies similar to those in their native ranges. The successful establishment of  
276 anadromous exotic salmonids in Chile reinforces the hypothesis that the biotic and abiotic conditions  
277 required for diadromy to be maintained (Gross et al., 1988) are present in Chilean waters.

278         Temperate areas of southern Chile may be considered a favourable environment for the  
279 development and maintenance of migratory strategy in fishes. While a limited number of fishes around  
280 the world are considered to exhibit some form of diadromy (Nelson, 2006), most are confined to areas  
281 such as islands (in Iceland, Hawaii, Falklands, Chathams the entire freshwater fish fauna exhibits  
282 diadromy) and temperate areas with recent geological origin (McDowall, 1988). Comparative otolith  
283 microchemistry analysis suggests that fishes of southern Chile may require a heterogeneous and  
284 spatially connected environment to complete their life-cycles. Many species may also have  
285 physiological adaptations or plasticity that allow for osmoregulation in a wide range of saline and  
286 freshwater environments (euryhaline life history).

287

### 288         **Limitations and further studies**

289         Some otolith results may have been influenced by maternal effects or induced by local temporal  
290 variation in water chemistry. Further studies may indicate whether the higher Sr:Ca ratios in primordia  
291 observed in some species could be attributable to maternal effects or other causes. For example,  
292 although the mechanisms are not completely understood, physiological constraints in early ontogeny  
293 could increase the rate of Sr absorption into the calcium carbonate matrix of the otolith (de Pontual et  
294 al., 2003). Also, as the Baker corridor is influenced by a large ice field (Campo de Hielo Norte), high  
295 amounts of glacier flour (suspended solids) can contribute to increased salinity levels in water that  
296 flows into the estuary (Vargas et al., 2011; Marín et al., 2013). These seasonal salinity changes may  
297 promote the uptake of Sr into the otolith matrix and confound the assumption of low Sr in freshwater  
298 environments (Zimmerman, 2005). Therefore, even though Sr has been traditionally recognized as a  
299 very robust marker to discriminate between saline and freshwater environments, several recent studies

300 have indicated that factors as species-specific variation, environmentally-mediated physiological  
301 processes and individual variation can influence Sr uptake into the otolith matrix (Sturrock et al.,  
302 2015).

303 This study suggests that considerable variation in migratory life history may exist in Chilean  
304 fishes, but its inferential scope is restricted by the limited number of samples which were collected for  
305 other research purposes (see Correa & Hendry, 2012; Correa et al., 2012; Alò et al., 2013). Species-  
306 specific reference values for Sr:Ca ratios and a more comprehensive sampling will be needed to  
307 effectively characterize and quantify the extent of fish movements within Chilean continental waters.  
308 Ideally, a variety of different field techniques (natural markers such as stable isotopes, otoliths,  
309 statoliths for lampreys, or scales, as well as molecular markers, tagging, trapping and tracking) and  
310 laboratory methods (movement physiology, swimming performance, metabolism) (see Dingle, 2014)  
311 could be used to characterize daily and seasonal migration patterns. Indeed, experimental methods  
312 related to swimming performance and unidirectional movement propensity are now employed in design  
313 of fish passage structures to benefit Chilean native fishes (Laborde et al., 2016).

314

### 315 **Conservation issues**

316 This study could help refine the conservation priorities for freshwater fishes in southern Chile.  
317 Given high endemism and the likelihood of dependence on diadromous behaviour, potential threats to  
318 fishes from fragmentation of river-to-estuary networks are correspondingly high. Hydroelectric power  
319 development causes loss of hydrological connectivity and alteration of river flows, disproportionately  
320 affecting fishes with migratory life histories.

321 Comparative otolith microchemistry results underscore the variation in life history strategies  
322 that should be accounted for when planning to manipulate water-flow for hydroelectric developments.  
323 Diadromous species depend on the habitat diversity and complexity created by unobstructed  
324 watersheds and are locally extirpated when barriers preclude movement to essential habitat.

325 Additionally, anthropogenic barriers and alterations to water flow (e.g., hydropeaking) may also  
326 negatively affect landlocked populations because such structures disrupt successful reproduction,  
327 recruitment and habitat quality (Alò & Turner, 2005; Fullerton et al., 2010; Garcia et al., 2011). Current  
328 hydropower capacity in Chile, now ~6.000 megawatts of energy connected to the central grid, is  
329 expected to nearly double to ~ 11.000MW by the year 2020 in the southern sector of the country  
330 (Santana et al., 2014). Development is slated in basins that harbour the majority of native fish species  
331 diversity.

332 Ongoing spread of exotic species threatens native species through negative interactions  
333 including predation, competition, behavioural inhibition and homogenization (Correa & Gross, 2008;  
334 Penaluna et al., 2009; Correa & Hendry, 2012; Correa et al., 2012; Habit et al., 2012; Arismendi et al.,  
335 2014; Vargas et al., 2015). In particular, establishment of migration runs of *O. tshawytscha* and *O.*  
336 *kisutch* could trigger additional threats such as the shift of significant amounts of marine-derived  
337 nutrients to previously oligotrophic environments (Helfield & Naiman, 2001; Arismendi & Soto, 2012)  
338 and increased competition for limited resources with the native diadromous species. Ironically, non-  
339 native salmon and trout are also likely to be negatively affected by future hydroelectric dams.  
340 Additional hydropower development will almost certainly impact a flourishing tourism industry  
341 supported by salmonid recreational fisheries (Arismendi & Nahuelhual, 2007; Vigliano et al., 2007).

342 The evolutionary processes that allowed dispersal and colonization of Patagonian fishes are  
343 influenced by the region's unique geography, climate, and geological processes. To ensure proper  
344 conservation of native freshwater, diadromous, and commercially relevant sport fisheries, managers  
345 will have to carefully designate and protect critical habitats, and in many cases mitigate obstruction of  
346 river flows imposed by dams with appropriate fish passage structures (Wilkes et al., 2017). Long-term  
347 monitoring should also be a priority to understand the broad impacts of hydropower development on  
348 aquatic biodiversity.

349

350 **Supporting Information**

351 All elemental data will be provided in a data dryad file (<http://datadryad.org/>) upon publication of this  
352 manuscript. The following additional tables and figures are provided as supplement to this manuscript  
353 and are available for review:

354 Table S1: A list of Continental Native Fishes of Chile, including life histories and/or habitat.

355 Table S2: Description of the samples analysed and CART Splitting means and standard deviations.

356 S3: Pictures of each otolith associated with a graph reporting Sr:Ca transect data.

357



## References

Alò, D., C. Correa, C. Arias, & L. Cárdenas, 2013. Diversity of Aplochiton Fishes (Galaxiidea) and the Taxonomic Resurrection of *A. marinus*. PLoS ONE 8: e71577,

<http://dx.plos.org/10.1371/journal.pone.0071577>.

Alò, D., & T. F. Turner, 2005. Effects of Habitat Fragmentation on Effective Population Size in the Endangered Rio Grande Silvery Minnow. Conservation Biology 19: 1138–1148, <http://blackwell-synergy.com/doi/abs/10.1111/j.1523-1739.2005.00081.x>.

Araya, M., E. J. Niklitschek, D. H. Secor, & P. M. Piccoli, 2014. Partial migration in introduced wild chinook salmon (*Oncorhynchus tshawytscha*) of southern Chile. Estuarine, Coastal and Shelf Science 149: 87–95.

Arismendi, I., & L. Nahuelhual, 2007. Non-native Salmon and Trout Recreational Fishing in Lake Llanquihue , Southern Chile: Economic. Reviews in Fisheries Science 15: 311–325.

Arismendi, I., B. E. Penaluna, J. B. Dunham, C. García de Leaniz, D. Soto, I. A. Fleming, D. Gomez-Uchida, G. Gajardo, P. V. Vargas, & J. León-Muñoz, 2014. Differential invasion success of salmonids in southern Chile: patterns and hypotheses. Reviews in Fish Biology and Fisheries ,

<http://link.springer.com/10.1007/s11160-014-9351-0>.

Arismendi, I., & D. Soto, 2012. Are salmon-derived nutrients being incorporated in food webs of invaded streams? Evidence from southern Chile. Knowledge and Management of Aquatic Ecosystems 405: 1–6.

Arkhipkin, A. I., P. C. Schuchert, & L. Danyushevsky, 2009. Otolith chemistry reveals fine population structure and close affinity to the Pacific and Atlantic oceanic spawning grounds in the migratory southern blue whiting (*Micromesistius australis australis*). Fisheries Research 96: 188–194,

<http://linkinghub.elsevier.com/retrieve/pii/S0165783608003512>.

- Ashford, J. R., C. M. Jones, E. Hofmann, I. Everson, C. Moreno, G. Duhamel, & R. Williams, 2005. Can otolith elemental signatures record the capture site of Patagonian toothfish (*Dissostichus eleginoides*), a fully marine fish in the Southern Ocean? *Canadian Journal of Fisheries and Aquatic Sciences NRC Research Press* 62: 2832–2840, <http://www.ingentaconnect.com/content/nrc/cjfas/2005/00000062/00000012/art00018>.
- Augspurger, J. M., M. Warburton, & G. P. Closs, 2015. Life-history plasticity in amphidromous and catadromous fishes: a continuum of strategies. *Reviews in Fish Biology and Fisheries Springer International Publishing* 27: 177–192.
- Breiman, L., J. Friedman, C. J. Stone, & R. A. Olshen, 1984. *Classification and regression trees*. CRC Press.
- Campana, S. E., 2005. Otolith science entering the 21st century. *Marine and Freshwater Research* 56: 485, <http://www.publish.csiro.au/?paper=MF04147>.
- Ciancio, J. E., M. a. Pascual, J. Lancelotti, C. M. R. Rossi, & F. Botto, 2005. Natural Colonization and Establishment of a Chinook Salmon, *Oncorhynchus tshawytscha*, Population in the Santa Cruz River, an Atlantic Basin of Patagonia. *Environmental Biology of Fishes* 74: 219–227, <http://link.springer.com/10.1007/s10641-005-0208-1>.
- Correa, C., A. P. Bravo, & A. P. Hendry, 2012. Reciprocal trophic niche shifts in native and invasive fish: Salmonids and galaxiids in Patagonian lakes. *Freshwater Biology* 57: 1769–1781.
- Correa, C., & M. R. Gross, 2008. Chinook salmon invade southern South America. *Biological Invasions* 10: 615–639, <http://www.springerlink.com/index/10.1007/s10530-007-9157-2>.
- Correa, C., & A. P. Hendry, 2012. Invasive salmonids and lake order interact in the decline of puye grande *Galaxias platei* in western Patagonia lakes. *Ecological Applications* 22: 828–842.
- De'ath, G., 2002. Multivariate regression trees: A new technique for modeling species-environment

relationships. *Ecology* 83: 1105–1117.

de Pontual, H., F. Lagardere, R. Amara, M. Bohn, & A. Ogor, 2003. Influence of ontogenetic and environmental changes in the otolith microchemistry of juvenile sole (*Solea solea*). *Journal of Sea Research* 50: 199–210.

Diario Oficial de la Republica de Chile, 2008. Tercer Proceso de Clasificacion de Especies segun su Estado de Conservacion. Santiago de Chile 39.100: 4–5,  
file:///Users/Dominique/Documents/Library/DS\_51\_2008\_3erProcesoClasif\_completo.pdf.

Dingle, H., 2014. *Migration: The Biology of Life on the Move*. Oxford University Press, Inc, New York.

Dingle, H. D., & V. A. Drake, 2007. What Is Migration?. *BioScience* 57: 113–121.

Dyer, B. S., 2000. Systematic review and biogeography of the freshwater fishes of Chile. *Estud. Oceanol* 19: 77–98, [http://www.uantof.cl/recursos\\_mar/pdf/vol19/vol19\\_77.pdf](http://www.uantof.cl/recursos_mar/pdf/vol19/vol19_77.pdf).

Fullerton, A. H., K. M. Burnett, E. A. Steel, R. L. Flitcroft, G. R. Pess, B. E. Feist, C. E. Torgersen, D. J. Miller, & B. L. Sanderson, 2010. Hydrological connectivity for riverine fish: measurement challenges and research opportunities. *Freshwater Biology* 55: 2215–2237,  
<http://doi.wiley.com/10.1111/j.1365-2427.2010.02448.x>.

Garcia, A., K. Jorde, E. M. Habit, D. Caamano, & O. Parra, 2011. Downstream Environmental Effects of Dam Operations: Changes in Habitat Quality for Native Fish Species. *27*: 312–327.

Górski, K., J. F. González, A. Vivancos, E. M. Habit, & D. E. Ruzzante, 2016. Young-of-the-year Coho Salmon *Oncorhynchus kisutch* recruit in fresh waters of remote Patagonian fjords in southern Chile (51°S). *Biological Invasions* , <http://link.springer.com/10.1007/s10530-016-1341-9>.

Górski, K., E. M. Habit, M. A. Pingram, & A. J. Manosalva, 2015. Variation of the use of marine resources by *Galaxias maculatus* in large Chilean rivers. *Hydrobiologia* ,

<http://link.springer.com/10.1007/s10750-015-2542-4>.

Gross, M. R., 1987. Evolution of diadromy in fishes. American Fisheries Society Symposium 1: 14–25, <http://labs.eeb.utoronto.ca/gross/Gross1987.pdf>.

Gross, M. R., R. M. Coleman, & R. M. McDowall, 1988. Aquatic Productivity and the Evolution of Diadromous Fish Migration. Science 239: 1291–1293, <http://labs.eeb.utoronto.ca/gross/Grossetal1988.pdf>.

Habit, E., B. S. Dyer, & I. Vila, 2006. Current state of knowledge of freshwater fishes of Chile. Gayana 70: 100–113, <http://www.citeulike.org/group/13417/article/7124955>.

Habit, E., J. Gonzalez, D. E. Ruzzante, & S. J. Walde, 2012. Native and introduced fish species richness in Chilean Patagonian lakes: Inferences on invasion mechanisms using salmonid-free lakes. Diversity and Distributions 18: 1153–1165.

Habit, E. M., & P. Victoriano, 2005. Peces de agua dulce de la Cordillera de la Costa Biodiversidad y Ecología de la Cordillera de la Costa de Chile. : 374–389.

Halden, N. M., S. R. Mejia, J. A. Babaluk, J. D. Reist, A. H. Kristofferson, J. L. Campbell, & W. J. Teesdale, 2000. Oscillatory zinc distribution in Arctic char (*Salvelinus alpinus*) otoliths: The result of biology or environment?. Fisheries Research 46: 289–298.

Helfield, J. M., & R. J. Naiman, 2001. Effects of Salmon-Derived Nitrogen on Riparian Forest Growth and Implications for Stream Productivity. Ecology 82: 2403–2409.

Hicks, A. S., G. P. Closs, & S. E. Swearer, 2010. Otolith microchemistry of two amphidromous galaxiids across an experimental salinity gradient: A multi-element approach for tracking diadromous migrations. Journal of Experimental Marine Biology and Ecology 394: 86–97.

Howland, K. L., W. M. Tonn, J. a. Babaluk, & R. F. Tallman, 2001. Identification of Freshwater and Anadromous Inconnu in the Mackenzie River System by Analysis of Otolith Strontium. Transactions

of the American Fisheries Society 130: 725–741.

Instituto Nacional de Estadísticas, 2015. Características generales de los principales ríos de Chile. Informe Medio Ambiente. ,

[http://historico.ine.cl/medioambiente/descargas/2015/xls/CAP5\\_AGUA.xlsx](http://historico.ine.cl/medioambiente/descargas/2015/xls/CAP5_AGUA.xlsx).

IUCN, 2015. The IUCN Red List of Threatened Species. , [www.iucnredlist.org](http://www.iucnredlist.org).

Joo, Y.-J., C. S. Kim, & S.-H. Yoo, 2015. Energy Consumption, Co2 Emission, and Economic Growth: Evidence from Chile. *International Journal of Green Energy* 12: 543–550,

<http://www.tandfonline.com/doi/abs/10.1080/15435075.2013.834822>.

Kalish, J. M., 1990. Use of Otolith Microchemistry to Distinguish the Progeny of Sympatric Anadromous and Non-anadromous Salmonids. 88: 657–666.

Kraus, R., 2004. Incorporation of strontium into otoliths of an estuarine fish. *Journal of Experimental Marine Biology and Ecology* 302: 85–106,

<http://linkinghub.elsevier.com/retrieve/pii/S0022098103005094>.

L'opez-de-Lacalle, 2016. *tsoutliers: Detection of Outliers in Time Series*. , <https://cran.r-project.org/package=tsoutliers>.

Laborde, A., A. Gonzalez, C. Sanhueza, P. Arriagada, M. A. Wilkes, E. M. Habit, & O. Link, 2016. Hydropower Development, Riverine Connectivity, and Non-sport Fish Species: criteria for Hydraulic Design of Fishways. *River Research and Applications* 32: 1949–1957.

Limburg, K. E., P. Landergren, L. Westin, M. Elfman, & P. Kristiansson, 2001. Flexible modes of anadromy in Baltic sea trout: making the most of marginal spawning streams. *Journal of Fish Biology* 59: 682–695.

Marín, V. H., A. Tironi, M. Alejandra, & M. Contreras, 2013. Modeling suspended solids in a Northern Chilean Patagonia glacier-fed fjord: GLOF scenarios under climate change conditions. *Ecological*

Modelling Elsevier B.V. 264: 7–16, <http://dx.doi.org/10.1016/j.ecolmodel.2012.06.017>.

McDowall, R. M., 1968. The application of the terms anadromous and catadromous to the southern hemisphere salmonoid fishes. *Copeia* 1: 176–178, <http://www.jstor.org/stable/1441572>.

McDowall, R. M., 1971. The galaxiid fishes of South America. *Zoological Journal of the Linnean Society* 50: 33–73, <http://doi.wiley.com/10.1111/j.1096-3642.1971.tb00751.x>.

McDowall, R. M., 1988. *Diadromy in Fishes*. Timber Press, Portland, Oregon.

McDowall, R. M., 1992. Diadromy □: Origins and Definitions of Terminology. *Copeia* 1992: 248–251.

McDowall, R. M., 1997. The evolution of diadromy in fishes (revisited) and its place in phylogenetic analysis. *Reviews in Fish Biology and Fisheries* 7: 443–462, <http://www.springerlink.com/index/G2X7V111785101V5.pdf>.

McDowall, R. M., 2002. The origin of salmonid fishes: Marine, freshwater ... or neither?. *Reviews in Fish Biology and Fisheries* 11: 171–179.

Ministerio del Medio Ambiente, 2013. *Especies: Clasificación según estado de conservación*. , [http://www.mma.gob.cl/clasificacionespecies/doc/UNIFICADA\\_de\\_Especie\\_Estado\\_Conservacion\\_Nov2014\\_publico.xls](http://www.mma.gob.cl/clasificacionespecies/doc/UNIFICADA_de_Especie_Estado_Conservacion_Nov2014_publico.xls).

Myers, G. S., 1949. Usage of anadromous, catadromous and allied terms for migratory fishes. *Copeia* JSTOR 1949: 89–97, <http://www.jstor.org/stable/1438482>.

Nelson, J. S., 2006. *Fishes of the world*. John Wiley & Sons Inc, Hoboken, New Jersey, [http://www.worldcat.org/title/fishes-of-the-world/oclc/28965588&referer=brief\\_results](http://www.worldcat.org/title/fishes-of-the-world/oclc/28965588&referer=brief_results).

Penaluna, B. E., I. Arismendi, & D. Soto, 2009. Evidence of Interactive Segregation between Introduced Trout and Native Fishes in Northern Patagonian Rivers, Chile. *Transactions of the American Fisheries Society* 138: 839–845.

Pracheil, B. M., J. D. Hogan, J. Lyons, & P. B. McIntyre, 2014. Using Hard-Part Microchemistry to

Advance Conservation and Management of North American Freshwater Fishes. *Fisheries* 39: 451–465, <http://www.tandfonline.com/doi/abs/10.1080/03632415.2014.937858>.

Proctor, C. H., & R. E. Thresher, 1998. Effects of specimen handling and otolith preparation on concentration of elements in fish otoliths. *Marine Biology* 131: 681–694.

Pulido, F., 2007. The Genetics and Evolution of Avian Migration. *Bio Science* 57: 165–174.

Santana, C., M. Falvey, M. Ibarra, & M. Garcia, 2014. *Energias Renovables en Chile. El potencial eolico, solar e hidroelectrico de Arica a Chiloe*. Santiago de Chile.

Secor, D. H., & J. R. Rooker, 2000. Is otolith strontium a useful scalar of life cycles in estuarine fishes? *Fisheries Research* 46: 359–371.

Strobl, C., 2009. An Introduction to Recursive Partitioning: Rationale, Application and Characteristics of Classification and Regression Trees, Bagging and Random Forests. *Psychol Methods* 14: 323–348.

Sturgeon, R. E., S. N. Willie, L. Yang, R. Greenberg, R. O. Spatz, Z. Chen, C. Scriver, V. Clancy, J. W. Lam, & S. Thorrold, 2005. Certification of a fish otolith reference material in support of quality assurance for trace element analysis. *Journal of Analytical Atomic Spectrometry* 20: 1067.

Sturrock, A. M., E. Hunter, J. A. Milton, R. C. Johnson, C. P. Waring, & C. N. Trueman, 2015. Quantifying physiological influences on otolith microchemistry. *Methods in Ecology and Evolution* 6: 806–816.

Therneau, T. M., & E. J. Atkinson, 1997. *An Introduction to Recursive Partitioning Using the RPART Routines*. Mayo Foundation: Technical Report 1–62, <http://www.mayo.edu/hsr/techrpt/61.pdf%5Cnpapers2://publication/uuid/FBFAD678-1996-4865-9F66-7A3E3921287B>.

Vargas, C. A., M. Aguayo, & R. Torres, 2011. Allochthonous subsidies of organic matter across a lake – river – fjord landscape in the Chilean Patagonia: Implications for marine zooplankton in inner fjord

areas. *Continental Shelf Research Elsevier* 31: 187–201, <http://dx.doi.org/10.1016/j.csr.2010.06.016>.

Vargas, P. V., I. Arismendi, & D. Gomez-uchida, 2015. Evaluating taxonomic homogenization of freshwater fish assemblages in Chile. *Revista Chilena de Historia Natural* *Revista Chilena de Historia Natural*, <http://dx.doi.org/10.1186/s40693-015-0046-2>.

Vigliano, P. H., M. F. Alonso, & M. Aquaculture, 2007. *Salmonid Introductions in Patagonia: A Mixed Blessing. Ecological and Genetic Implications of Aquaculture Activities*. Springer Netherlands, Dordrecht, [http://dx.doi.org/10.1007/978-1-4020-6148-6\\_17](http://dx.doi.org/10.1007/978-1-4020-6148-6_17).

Vignon, M., 2015. Extracting environmental histories from sclerochronological structures - Recursive partitioning as a mean to explore multielemental composition of fish otolith. *Ecological Informatics* 30: 159–169.

Vila, I., S. Scott, M. A. Mendez, F. Valenzuela, P. Iturra, & E. Poulin, 2011. *Orestias gloriae*, a new species of cyprinodontid fish from saltpan spring of the southern high Andes (Teleostei: Cyprinodontidae). *Ichthyological Exploration of Freshwaters* 22: 345–353.

Volk, E. C., A. Blakley, S. L. Schroder, & S. M. Kuehner, 2000. Otolith chemistry reflects migratory characteristics of Pacific salmonids: Using otolith core chemistry to distinguish maternal associations with sea and freshwaters. *Fisheries Research* 46: 251–266.

Waples, R. S., R. W. Zabel, M. D. Scheuerell, & B. L. Sanderson, 2007. Evolutionary responses by native species to major anthropogenic changes to their ecosystems: Pacific salmon in the Columbia River hydropower system. *Molecular Ecology* 17: 84–96.

Wilkes, M., M. Mckenzie, & J. A. Webb, 2017. Fish passage design for sustainable hydropower in the temperate Southern Hemisphere: an evidence review. *Reviews in Fish Biology and Fisheries* 1–19.

Yoshinaga, J., A. Nakama, M. Morita, & J. S. Edmonds, 2000. Fish otolith reference material for quality assurance of chemical analyses. *Marine Chemistry* 69: 91–97.



Zimmerman, C. E., 2005. Relationship of otolith strontium-to-calcium ratios and salinity: experimental validation for juvenile salmonids. *Canadian Journal of Fisheries & Aquatic Sciences* 62: 88–97.

Zimmerman, C. Z., & G. H. Reeves, 2002. Identification of Steelhead and Resident Rainbow Trout Progeny in the Deschutes River, Oregon, Revealed with Otolith Microchemistry. *Transactions of the American Fisheries Society* 131: 986–993.

## Figure Legends

**Fig. 1** Estimated distribution range for native Chilean galaxiids (shaded and dash lined polygons) and the sampling locations of specimens used in this study (dots) for a) genus *Aplochiton*, b) genus *Galaxias*, c) non-native fishes examined in this study

**Fig. 2** The uppermost image depicts a schematic representation of an otolith, showing how growth rings accrue over time around the core and culminate at the edge. The number of distinct layers in the otolith depends on the age of the individual. The images below represent idealized time series data obtained by repeatedly measuring (via laser ablation and spectrometry) elemental strontium to calcium (Sr:Ca) ratios across the otolith. Each box shows an expected time series for each life-history strategy. The blue dashed line represents the average Sr:Ca for freshwater as  $0.9 \text{ mmol}\cdot\text{mol}^{-1}$ , the orange dashed line for estuarine areas at  $2.0 \text{ mmol}\cdot\text{mol}^{-1}$ , and the black dashed line is drawn at  $3.4 \text{ mmol}\cdot\text{mol}^{-1}$  as the saltwater mean (Secor & Rooker, 2000)

**Fig. 3** a) Violin plot of Sr:Ca values for otoliths grouped by species. Black dot = median, White line = first to third quartile. Grey areas = kernel density plot. b) Extracted reference values from Fig. 7 in Secor and Rooker 2000. Average values of Sr:Ca ratios for freshwater, brackish and marine water are represented as dashed blue, orange, and black lines, respectively. Fading shades around each mean correspond to 10-90<sup>th</sup> percentiles for each average value

**Fig. 4** Detection of discontinuities by semi-supervised CART employed on Sr:Ca ratios for representative individuals of native and exotic fishes in southern Chile. Numbers after taxonomic names refer to the individual ID of each fish. The mean and standard deviation are delimited for each cluster in a grey box. Vertical dashed lines indicate splitting points induced by the condition used to fit the regression trees, which is reported for each individual graph as "cond". Reference values from Secor and Rooker (2000) are reported on the right-hand

side of the graph; see legend of Fig. 3

**Fig. 5** Total number of splits obtained by semisupervised CART on univariate Sr:Ca otolith data for all the species included in the study. Original data for native *A. taeniatus*, *A. marinus*, and *G. maculatus* and introduced *O tshawytscha* was divided in more than one homogenous cluster by semisupervised regression trees and led to rejection of the hypothesis of freshwater residency. Details for each individual and split reported in this graph are available in the supplementary material Table S2. "Trans" refers to the quality of the otolith transect, that is: "F" is a full or good quality transect, edge – core – edge, "H" is a half transect, edge – core; "P" is a partial transect, edge – core – extra data without reaching the next otolith edge; "O" is a flagged transect which failed to go through the core and may have some missing data. "St" refers to each fish's ontogenetic phase at the time of capture, where "J" is for juveniles and "A" for adult specimens; "Loc" indicates the sampling locality where AC: Aysén-Caro, CT: Chiloé-Tcoihue, VS: Valdivia-Santo Domingo, VL: Valdivia-Lingue, AP: Aysén-Palos, BE: Baker-estuary, AN: Aysén-Ñireguao, BJ: Baker-Jaramillo, PP: Petrohué-Patos, TP: Toltén-Peuco, TT: Toltén-Triful, AS: Aysén-Simpson, BV: Baker-Vargas; "ID" is the unique identification of each fish

**Table 1** Description of the samples studied and summary of results of migration pattern determination. Values correspond to the percentage of individuals assigned to one of five possible patterns: freshwater resident (FW), brackish water resident (B), anadromous (ANA), catadromous (CAT), amphidromous (AMPH) or else omitted from interpretation due to uncertainties in the otolith transects (O). For individual results, see Table S2

|                                  | Species                               | N          | Location               | Year   | Latitude | Longitude | Inferred Migratory Strategy (%) |      |      |      |      |      |
|----------------------------------|---------------------------------------|------------|------------------------|--------|----------|-----------|---------------------------------|------|------|------|------|------|
|                                  |                                       |            |                        |        |          |           | FW                              | B    | ANA  | CAT  | AMPH | O    |
| Native Galaxiids                 | <i>A. zebra</i> (Jenyns, 1842)        | 5          | Aysén-Caro             | 2009   | -45.80   | -72.55    | 100                             |      |      |      |      |      |
|                                  | <i>A. zebra</i>                       | 3          | Chiloé-Tocoihue        | 2011   | -42.30   | -73.44    |                                 | 100  |      |      |      |      |
|                                  | <i>A. taeniatus</i> (Eigenmann, 1928) | 8          | Valdivia-Santo Domingo | 2010   | -39.91   | -73.14    |                                 | 12.5 |      | 50   | 25   | 12.5 |
|                                  | <i>A. taeniatus</i>                   | 2          | Valdivia-Lingue        | 2011   | -39.46   | -73.09    |                                 |      |      | 100  |      |      |
|                                  | <i>A. taeniatus</i>                   | 3          | Aysén-Palos            | 2007   | -45.32   | -72.70    |                                 |      |      | 66.7 |      | 33.3 |
|                                  | <i>A. taeniatus</i>                   | 2          | Aysén-Caro             | 2009   | -45.80   | -72.55    | 100                             |      |      |      |      |      |
|                                  | <i>A. marinus</i> (Jenyns, 1842)      | 7          | Baker-estuary          | 2007   | -47.79   | -73.52    |                                 |      |      | 100  |      |      |
|                                  | <i>G. platei</i> (Steindachner, 1898) | 2          | Aysén-Palos            | 2007   | -45.32   | -72.70    | 100                             |      |      |      |      |      |
|                                  | <i>G. maculatus</i> (Jenyns, 1842)    | 4          | Chiloé-Tocoihue        | 2011   | -42.30   | -73.44    |                                 | 25   |      | 50   | 25   |      |
| Introduced Salmonids             | <i>S. trutta</i> (Linnaeus, 1758)     | 4          | Aysén-Palos            | 2007   | -45.32   | -72.70    | 100                             |      |      |      |      |      |
|                                  | <i>S. trutta</i>                      | 4          | Aysén-Caro             | 2009   | -45.80   | -72.55    | 100                             |      |      |      |      |      |
|                                  | <i>S. trutta</i>                      | 1          | Baker-estuary          | 2007   | -47.79   | -73.52    |                                 |      | 100  |      |      |      |
|                                  | <i>O. tshawytscha</i> (Walbaum, 1792) | 8          | Aysén-Ñireguao         | 2004   | -45.17   | -72.12    |                                 |      | 75   |      |      | 25   |
|                                  | <i>O. tshawytscha</i>                 | 8          | Baker-Jaramillo        | 2004   | -47.70   | -73.05    | 12.5                            |      | 50   |      |      | 37.5 |
|                                  | <i>O. tshawytscha</i>                 | 6          | Petrohué-Patos         | 2004   | -41.18   | -72.46    |                                 |      | 66.7 |      |      | 33.3 |
|                                  | <i>O. tshawytscha</i>                 | 4          | Toltén-Peuco           | 2004   | -38.85   | -71.76    |                                 |      | 50   |      |      | 50   |
|                                  | <i>O. tshawytscha</i>                 | 4          | Toltén-Triful          | 2004   | -38.85   | -71.67    |                                 |      | 50   |      |      | 50   |
|                                  | <i>O. tshawytscha</i>                 | 5          | Aysén-Simpson          | 2008   | -45.73   | -72.10    | 80                              |      |      |      |      | 20   |
|                                  | <i>O. kisutch</i> (Walbaum, 1792)     | 2          | Baker-Vargas           | 2007   | -47.68   | -73.04    |                                 |      | 100  |      |      |      |
| <i>O. mykiss</i> (Walbaum, 1792) | 3                                     | Aysén-Caro | 2009                   | -45.80 | -72.55   | 100       |                                 |      |      |      |      |      |



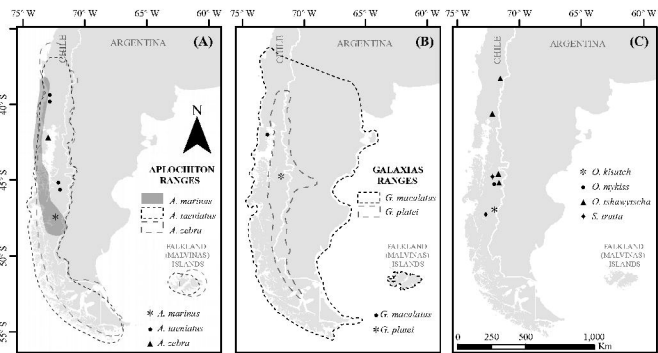

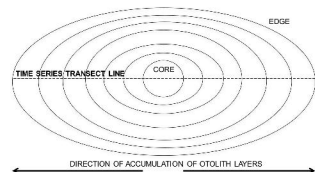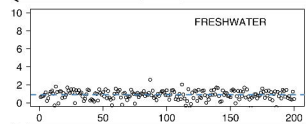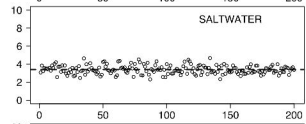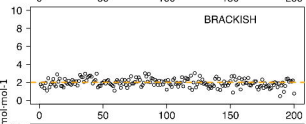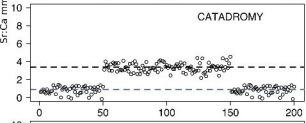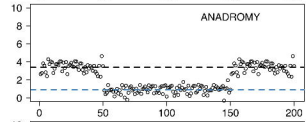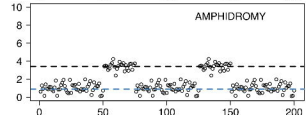

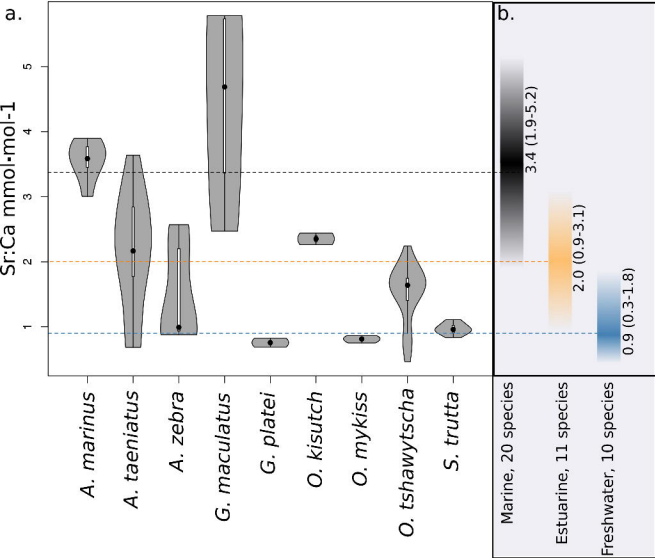



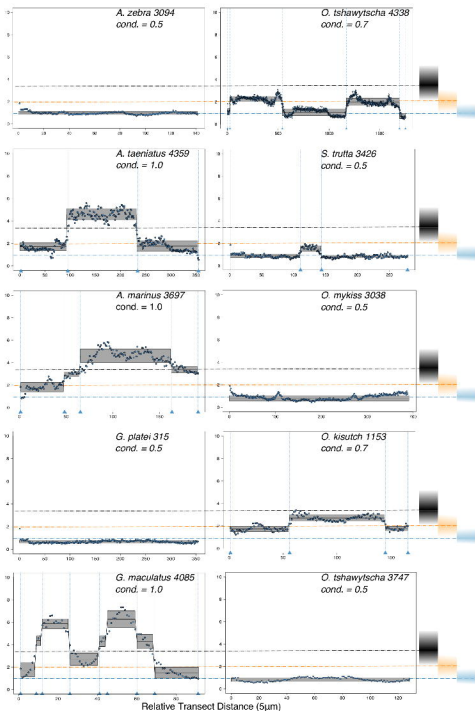

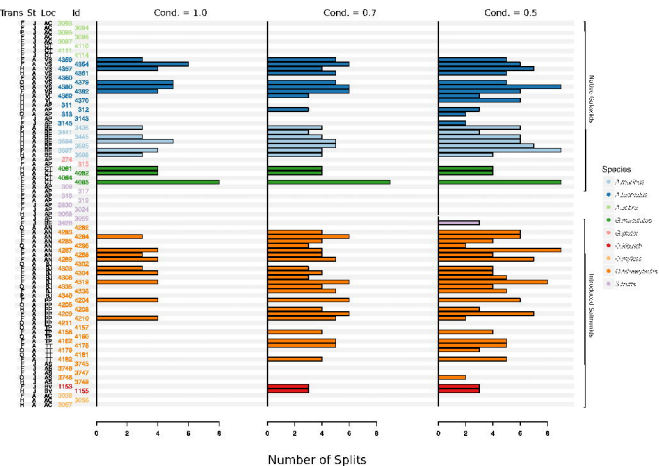

Source: https://www.biorxiv.org/content/10.1101/174656v3.full.pdf
